# Supplementary material for: Large-scale continuous hydrothermal production and activation of ZIF-8
Source: Royal Society of Chemistry journal article supplement (doi:10.1039/c5cc04636j), 2015-01-01
Supplement: c5cc04636j1.pdf [file c5cc04636j1.pdf]

## Experimental Details

Samples were synthesised using the continuous-flow-reactor designed by the Lester group which uses a counter-current mixing reactor to induce rapid reaction and crystallisation of the dissolved precursors.

All chemicals were purchased from Sigma Aldrich and Fisher Scientific and used without further purification.

### ZIF-8

A 0.06 M aqueous solution of  $\text{Zn}(\text{OAc})_2 \cdot 2\text{H}_2\text{O}$  was used in the upflow (room temperature,  $10 \text{ mL min}^{-1}$ ) and a 0.06 M aqueous solution of 2-methylimidazole (2-HMIm) was used in the downflow (room temperature-  $400 \text{ }^\circ\text{C}$ ,  $20 \text{ mL min}^{-1}$ ). To improve the rate of deprotonation of the acid, ammonium hydroxide ( $\text{NH}_4\text{OH}$ ) was also added to the organic solution in the ratio 1:8 (HMIm: $\text{NH}_4\text{OH}$ ). Final ratio of reagents is 1:2:16 (Zn: HMIm: $\text{NH}_4\text{OH}$ ).

### X-ray Diffraction

Powder X-ray Diffraction (PXRD) was performed on a Bruker D8-Advance diffractometer using  $\text{Cu K}_\alpha$  radiation,  $\lambda = 1.5415 \text{ \AA}$  over a  $2\theta$  range of  $5 - 40^\circ$ .

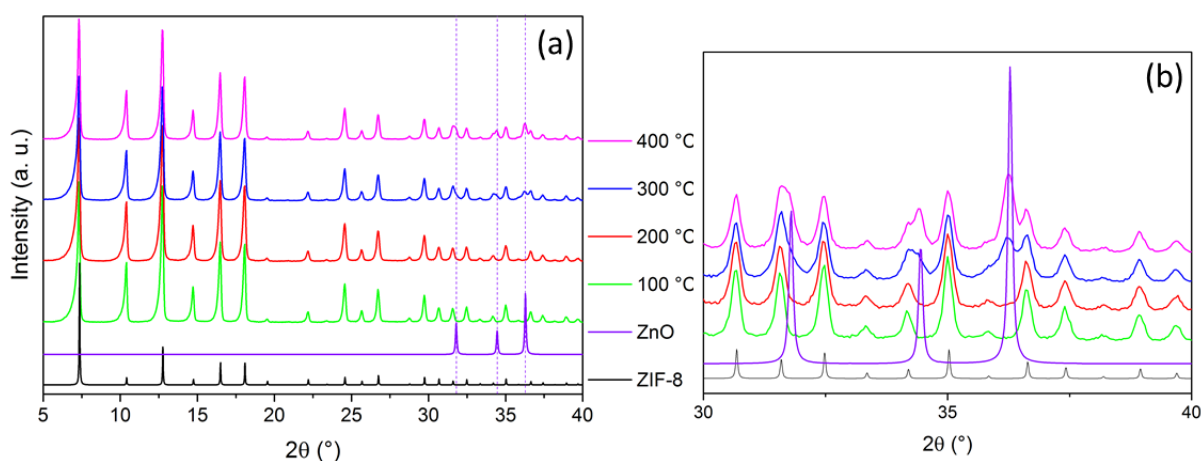

Figure A PXRD patterns for the ZIF-8 products synthesised using  $\text{N}(\text{Et})_3$  at RT, 100, 200, 300 and 400  $^\circ\text{C}$ . ZnO impurities can be seen in the product produced at 300 and 400  $^\circ\text{C}$ . The simulated patterns for ZIF-8 and ZnO are shown in black and purple respectively.

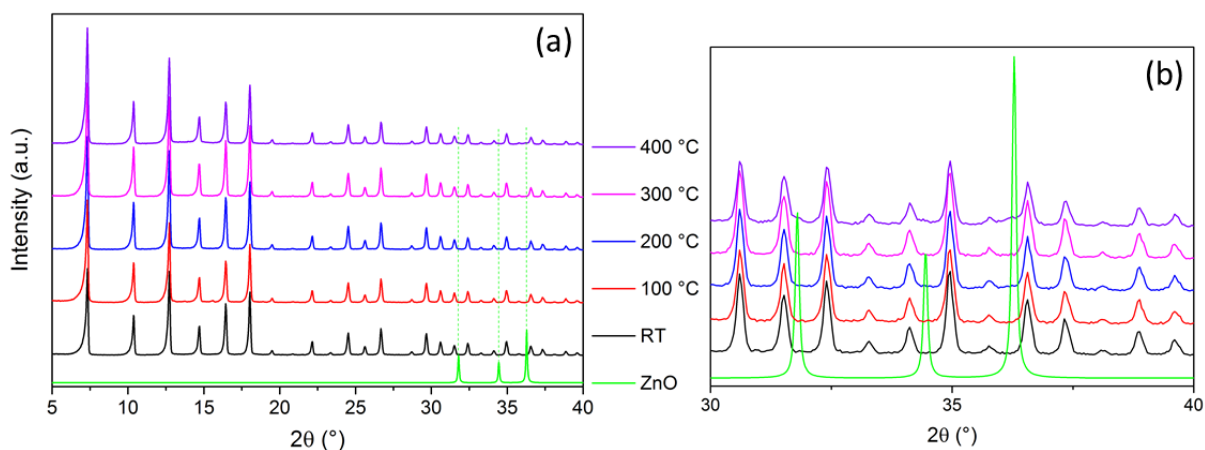

Figure B PXR D patterns for the ZIF-8 products synthesised using  $\text{NH}_4\text{OH}$  at RT, 100, 200, 300 and 400 °C. ZnO impurities can be seen in the product produced at 400 °C. The simulated patterns for ZIF-8 and ZnO are shown in black and green respectively.

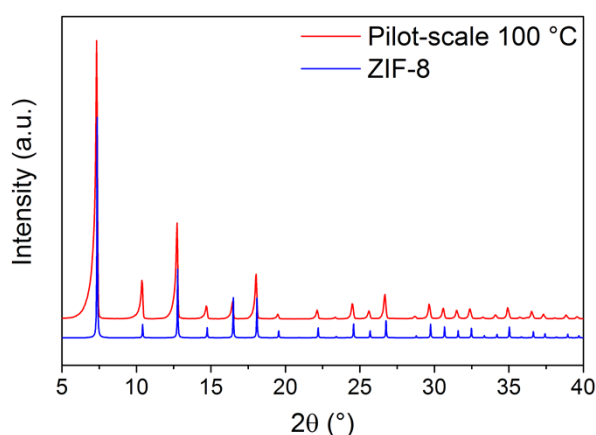

Figure C PXR D pattern for ZIF-8 synthesised at 100 °C, 0.06 M using the pilot-scale reactor. The simulated pattern for ZIF-8 is shown in blue.

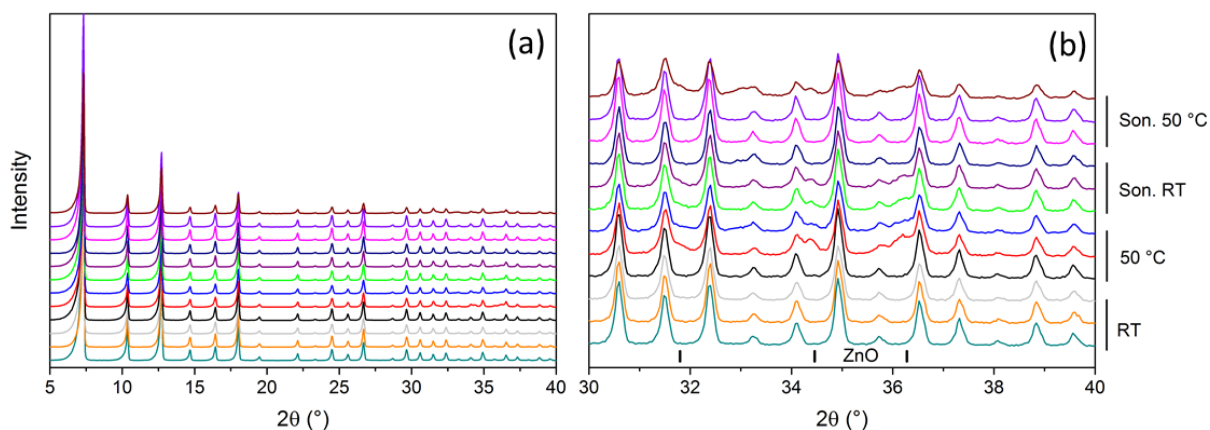

Figure D PXR D patterns for the ZIF-8 activated using the coil reactor. Sample method for activation, in ascending order, room temperature and dilutions of 1:1, 1:2 and 1:3, using a water bath at 50 °C and dilutions of 1:1, 1:2 and 1:3, sonicated water bath at room temperature and dilutions of 1:1, 1:2 and 1:3 and a sonicated water bath at 50 °C and dilutions of 1:1, 1:2 and 1:3. Synthesis conditions-  $\text{Zn}^{2+}$  0.06 M, reagent ratio 1:2:16 (zinc acetate: 2-methylimidazole: ammonium hydroxide), 100 °C.

## Thermogravimetric Analysis

Thermogravimetry data was recorded using a Q500 TA instruments thermogravimetric analyser. All material profiles were recorded between room temperature and 800 °C in air.

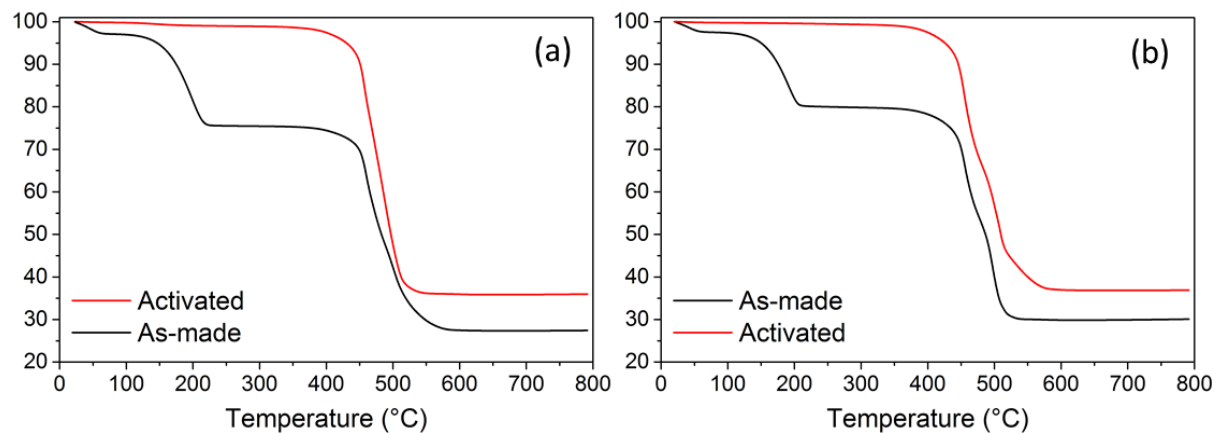

Figure E Thermogravimetric analysis of the as-made and activated products from the room temperature (a) and 400 °C (b) experiments.

## Surface Area Analysis

Nitrogen isotherms were recorded using a Micromeritics Tristar II 3020 surface area analyser. Partial pressure range was 0.01 – 0.99. The Microactive software, which uses the Rouquerol method, was used for determining the BET range for each dataset independently.

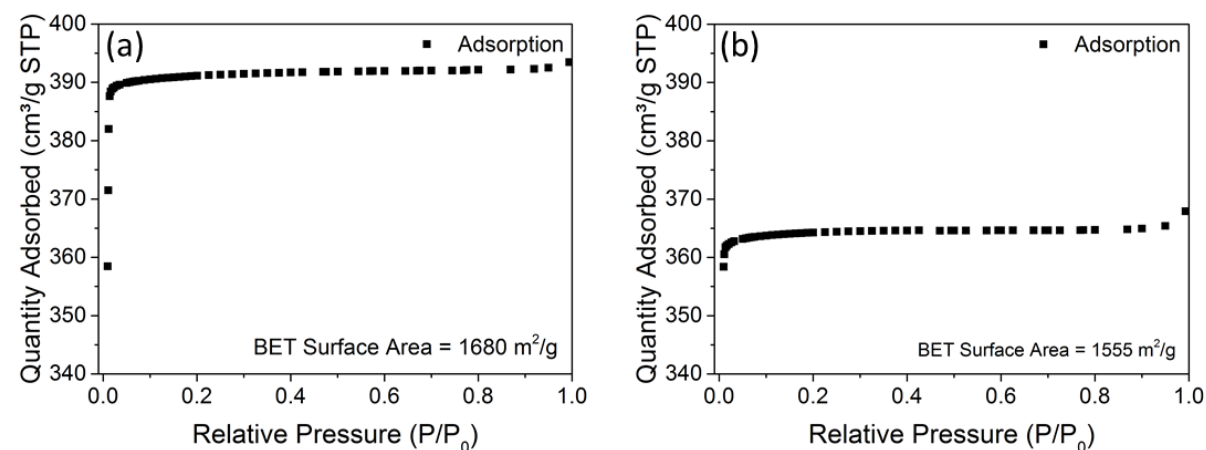

Figure F Nitrogen adsorption isotherms for the products produced at room temperature (a) and 400 °C (b). BET surface areas for each product are given.

Table A synthesis conditions and corresponding surface areas for various ZIF-8 materials. All products were synthesised with the reagent ratio of 1:2:16 (Zn<sup>2+</sup>:HMIm:NH<sub>4</sub>OH). <sup>†</sup>Bench batch-reaction performed for comparison, <sup>§</sup> reagent ratio was 1:4:16, \* pilot-scale reactor used for synthesis, a = reaction was performed under autogenous pressure created internally within the equipment.

| Synthesis Conditions |                |                                    |                  | Characterisation                                   |
|----------------------|----------------|------------------------------------|------------------|----------------------------------------------------|
| Temperature (°C)     | Pressure (bar) | Zn <sup>2+</sup> concentration (M) | Product          | BET Surface Area (m <sup>2</sup> g <sup>-1</sup> ) |
| <sup>†</sup> RT      | (Bench)        | 0.06                               | ZIF-8            | 1654                                               |
| RT                   | a              | 0.06                               | ZIF-8            | 1713                                               |
| RT                   | 240            | 0.06                               | ZIF-8            | 1680                                               |
| 100                  | a              | 0.06                               | ZIF-8            | 1806                                               |
| 100                  | 240            | 0.06                               | ZIF-8            | 1741                                               |
| 100                  | 240            | 0.24                               | Unknown impurity | 938                                                |
| 100                  | 240            | 0.015                              | ZIF-8            | 1805                                               |
| 400                  | 240            | 0.06                               | ZIF-8            | 1555                                               |
| <sup>§</sup> 100     | a              | 0.24                               | ZIF-8            | 1741                                               |
| *100                 | a              | 0.06                               | ZIF-8            | 1780                                               |

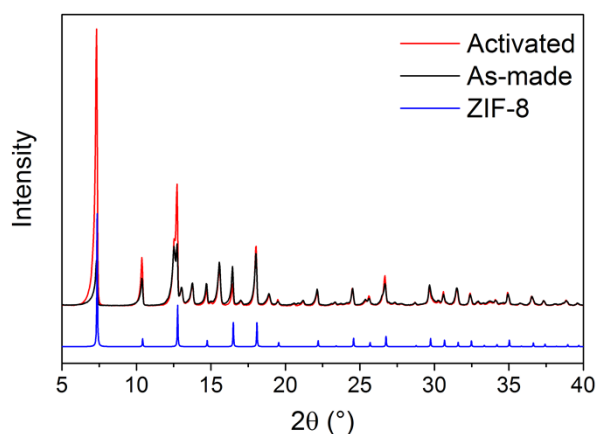

Figure G PXRD pattern of ZIF-8 before and after activation, synthesised at 100 °C and 0.24 M (Zn<sup>2+</sup>), showing the presence of an unidentified impurity phase. The simulated pattern for ZIF-8 is shown in blue.

## Space-Time Yield

Space-time yields were calculated based on the highest concentration reactions (Zn<sup>2+</sup> = 0.24 M) using the product concentration and the total internal volume of the reactor.

$$\sigma_p = \frac{m_p}{Vt}$$

**Metal salt concentration = 0.24 M**

units

Internal reactor volume (total pressurised pipework) 0.000055 m<sup>-3</sup>

|                |                                                      |               |                                         |
|----------------|------------------------------------------------------|---------------|-----------------------------------------|
|                | Total flow rate                                      | 30            | mL min <sup>-1</sup>                    |
|                | Product concentration                                | 0.0148        | kg L <sup>-1</sup>                      |
|                | Production rate (per hr)                             | 0.027         | kg hr <sup>-1</sup>                     |
| ( $\sigma_p$ ) | Production rate (per day [8 hours])                  | 0.213         | kg d <sup>-1</sup>                      |
|                | <b>Space-time yield (total pressurised pipework)</b> | <b>3874.9</b> | <b>kg m<sup>-3</sup> d<sup>-1</sup></b> |
